# Supplementary material
Source: publisher figshare collection journal article supplement (https://acs.figshare.com/ndownloader/files/22721390)
Supplement: Supplementary file 1 [file 22721390]

Supporting Information for

# **Direct CVD Growth of Graphene/MoS<sub>2</sub> Heterostructure with Interfacial Bonding for Two-Dimensional Electronics**

*Eunho Lee<sup>1</sup>, Seung Goo Lee<sup>2</sup>, Wi Hyoung Lee<sup>3</sup>, Hyo Chan Lee<sup>1</sup>, Nguyen Ngan Nguyen<sup>1</sup>, Min Seok Yoo<sup>1</sup>, and Kilwon Cho<sup>1\*</sup>*

## **AUTHOR AFFILIATIONS**

<sup>1</sup>Department of Chemical Engineering and Center for Advanced Soft Electronics, Pohang University of Science and Technology, Pohang 37673, Korea

\*E-mail: kwcho@postech.ac.kr

<sup>2</sup>Department of Chemistry, University of Ulsan, Ulsan 44610, Korea

<sup>3</sup>Department of Organic and Nano System Engineering, Konkuk University, Seoul 05029, Korea

## **KEYWORDS**

Graphene, Direct growth, Heterostructure, Transition metal dichalcogenides, Contact resistance

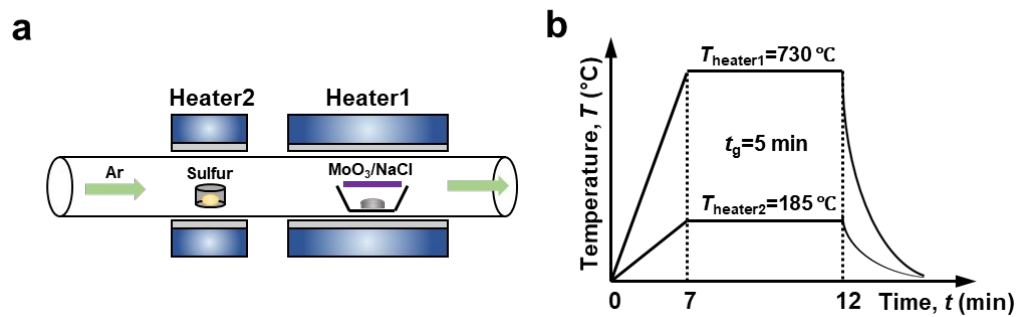

**Figure S1.** (a) Schematic diagram of the CVD experimental setup (b) and growth condition for MoS<sub>2</sub> synthesis.

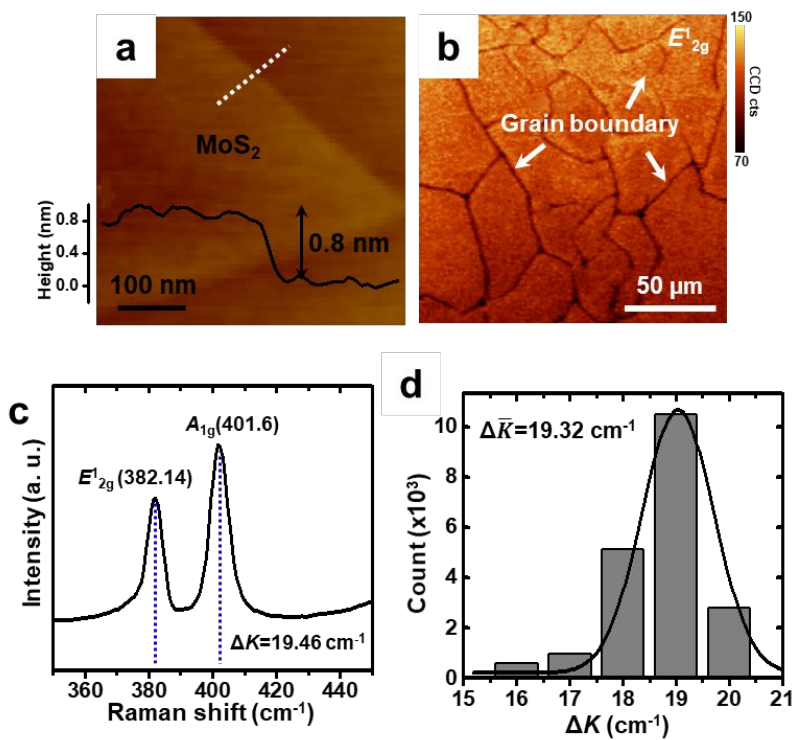

**Figure S2.** (a) AFM morphology of the MoS<sub>2</sub> monolayer for measuring thickness. (b)  $E_{12g}^1$  Raman mapping data and (c) single Raman spectrum of the synthesized MoS<sub>2</sub> monolayer on SiO<sub>2</sub>/Si substrate. (d) The statistics of the Raman peak difference between  $E_{12g}^1$  and  $A_{1g}$  peak of the synthesized MoS<sub>2</sub> layer.

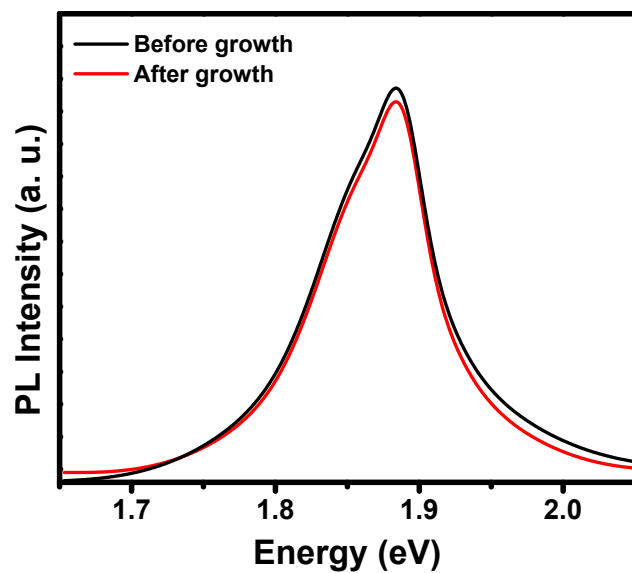

**Figure S3.** Photoluminescence spectra of the MoS<sub>2</sub> before (black) and after (red) graphene growth at the excitation wavelength of 514 nm.

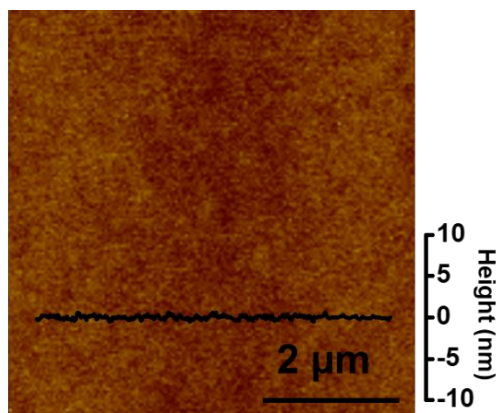

**Figure S4.** AFM morphology of synthesized graphene/MoS<sub>2</sub> heterostructure.

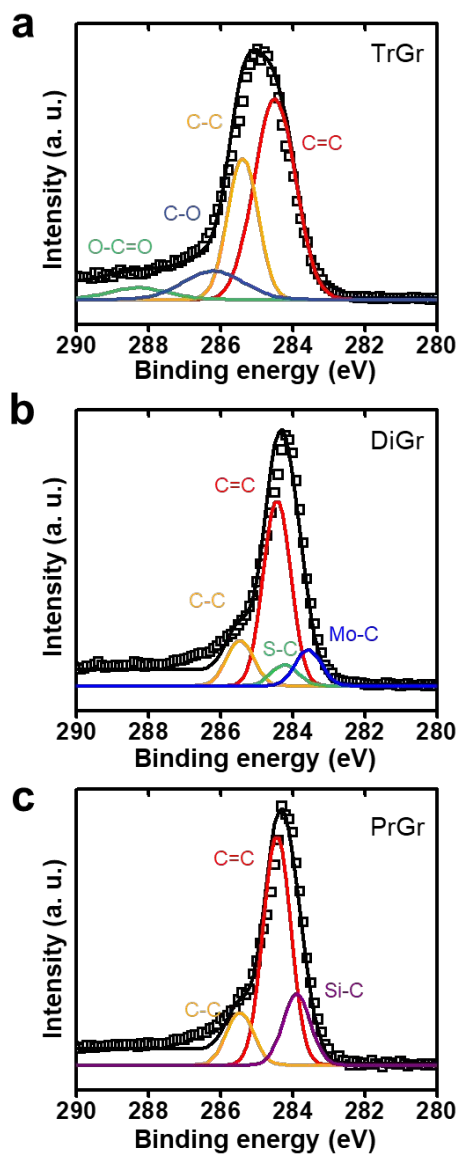

**Figure S5.** C1s XPS analysis of deconvoluted peaks of the interface between (a) MoS<sub>2</sub>/TrGr, (b) MoS<sub>2</sub>/DiGr, respectively. (c) C1s XPS analysis of the peak of the directly-grown graphene on SiO<sub>2</sub>/Si substrate (PrGr).

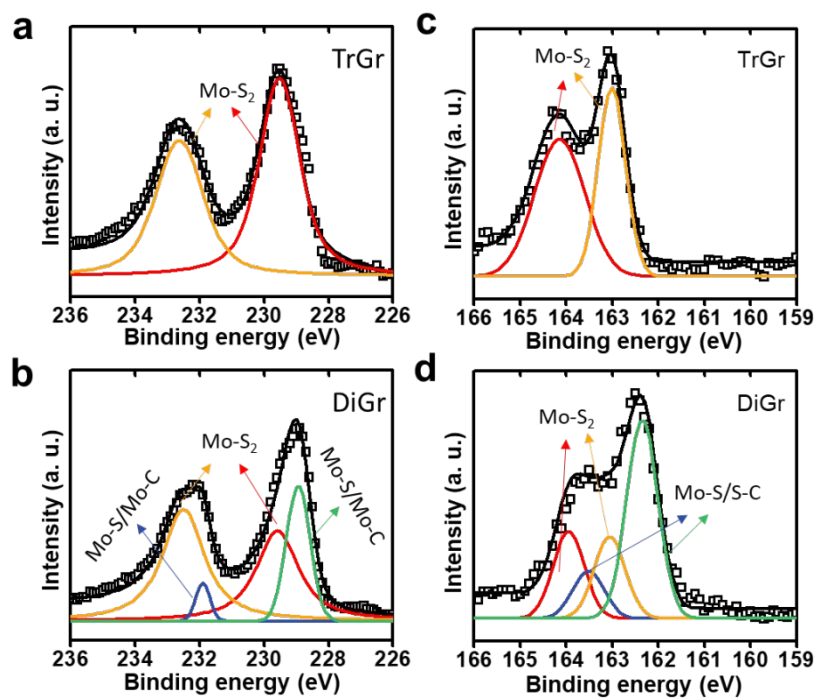

**Figure S6.** Mo3d XPS analysis of deconvoluted peaks of the interface between (a) MoS<sub>2</sub>/TrGr and (b) MoS<sub>2</sub>/DiGr. S2p XPS analysis of deconvoluted peaks of the interface between (c) MoS<sub>2</sub>/TrGr and (d) MoS<sub>2</sub>/DiGr.

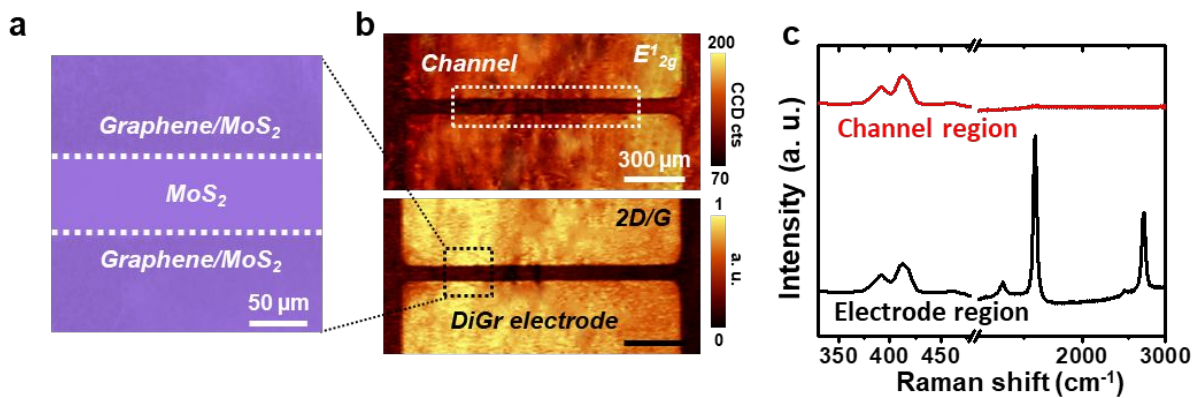

**Figure S7.** (a) Optical microscopy image of the channel region in the fabricated MoS<sub>2</sub>-FETs. (b) (top)  $E_{12g}$  and (bottom)  $2D/G$  Raman mapping data of directly grown patterned graphene on MoS<sub>2</sub> monolayer. (c) Single Raman spectrum of the channel region (white dashed area) and electrode region.



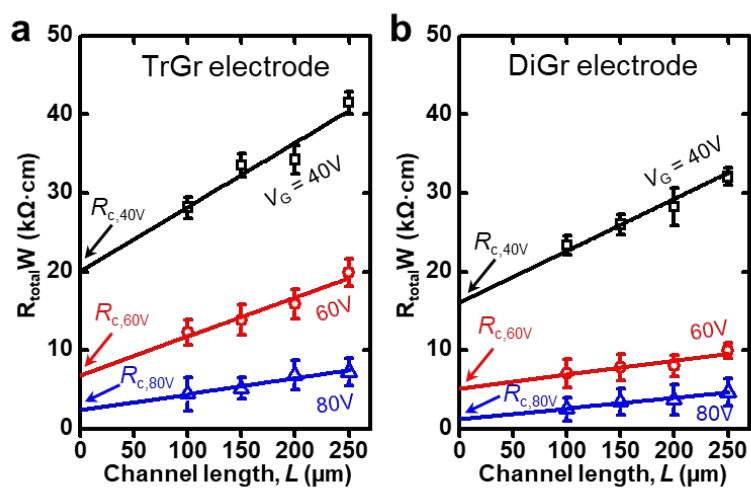

**Figure S8.** Channel width-normalized  $R_{\text{total}}$  obtained from the  $\text{MoS}_2$  FETs prepared with (a) transferred graphene electrodes (TrGr) and (b) directly-grown graphene electrodes (DiGr) on  $\text{SiO}_2/\text{Si}$  substrate.

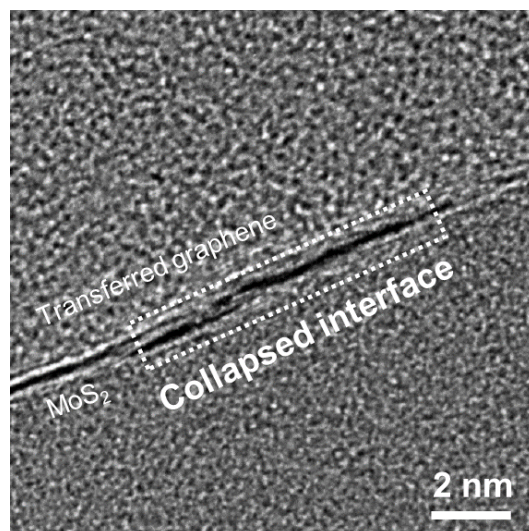

**Figure S9.** High resolution cross-sectional TEM image of the transferred graphene/MoS<sub>2</sub> monolayer interface on SiO<sub>2</sub>/Si substrate.

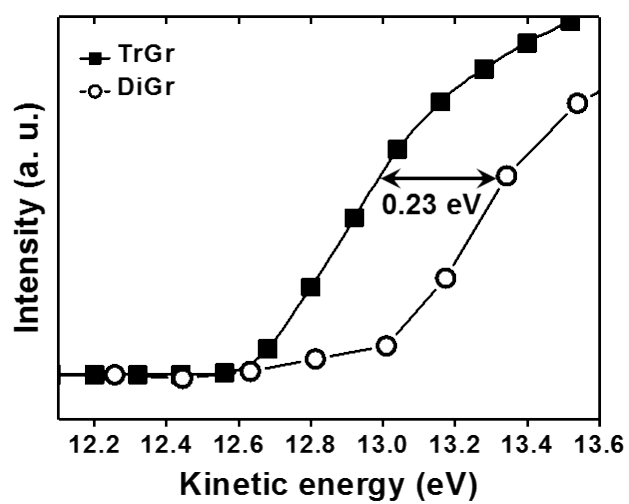

**Figure S10.** UPS curves obtained from TrGr (closed rectangular) and DiGr (open circle), in the secondary electron emission region.
